# Supplementary material
Source: PubMed Central journal article supplement (PMC4485378)
Supplement: NIHMS694625-supplement-01.pdf [file NIHMS694625-supplement-01.pdf]

## Supplementary Material:

## I. Literature Reviewed on Self-control's Relationship with High Risk Behavior

## Studies of non-offender samples

| Study                                  | Sample age                    | Sample description (size)                                                              | Study Design | Self Control Measure                      | Behavioral Outcome                   |
|----------------------------------------|-------------------------------|----------------------------------------------------------------------------------------|--------------|-------------------------------------------|--------------------------------------|
| 1 Baker, 2010                          | Adolescents                   | Middle & high school students<br>[Add Health]<br>(n=4,834)                             | Cross.       | Other                                     | Problem drinking                     |
| 2 Baron, Ford, Kay, 2007               | Adolescents & adults          | Homeless street youths<br>(n=125)                                                      | Cross.       | LSCS-modified                             | Crime & victimization                |
| 3 Beaver, DeLisi, Mears, Stewart, 2009 | Adolescents & adults          | Middle & high school students followed to adulthood<br>[Add Health]<br>(n=1,052-8,094) | Long.        | Other: Multi-rater scale                  | Contact with criminal justice system |
| 4 Beaver, DeLisi, Vaughn, Wright, 2008 | Adolescents & adults          | Middle & high school students followed to adulthood<br>[Add Health]<br>(n=767)         | Long.        | Other: 5 items                            | Delinquency                          |
| 5 Blackwell, Piquero, 2005             | Adults                        | Community members<br>[OCS]<br>(n=287)                                                  | Cross.       | LSCS                                      | Crime                                |
| 6 Burt, Simons, Simons, 2006           | Children, adolescents, adults | Community members (FACHS)<br>(n=754)                                                   | Long.        | Other: 39 items                           | Delinquency                          |
| 7 Cretacci 2008                        | Adolescents                   | Middle & high school students (Add Health)<br>(n= approx.. 4,800)                      | Long.        | Other: 25 items                           | Crime                                |
| 8 Desmond, Bruce, Stacer, 2012         | Adolescents                   | Middle & high school students (Add Health)<br>(n=unspecified)                          | Long.        | Other: 11 items                           | Drug use                             |
| 9 Hay, Forrest 2008                    | Adolescents                   | Community (NYSY79)<br>(n=750)                                                          | Cross.       | Other: 6 items                            | Crime                                |
| 10 Higgins, 2009                       | Children & adolescents        | Community members<br>(n=unspecified)                                                   | Long.        | Other: 9 items-mothers' report behavioral | Delinquency                          |
| 11 Holtfreter,                         | Adults                        | Undergraduate                                                                          | Cross.       | BSCS                                      | Crime &                              |

|    |                                                              |                                     |                                                                     |        |                                        |                                             |
|----|--------------------------------------------------------------|-------------------------------------|---------------------------------------------------------------------|--------|----------------------------------------|---------------------------------------------|
|    | Reisig,<br>Piquero,<br>Piquero, 2010                         |                                     | students<br>( <i>n</i> =305)                                        |        |                                        | Victimization                               |
| 12 | Larsen,<br>Overbeek,<br>Vermulst,<br>Granic,<br>Engels, 2010 | Adolescents                         | High school<br>students ( <i>n</i> =433)                            | Long.  | BSCS-modified                          | Alcohol use                                 |
| 13 | Leeper<br>Piquero,<br>Schoepfer,<br>Langton,<br>2008         | Adults                              | Adults enrolled<br>in business class<br>( <i>n</i> =87)             | Cross. | LSCS,<br>Other: 7 items-<br>behavioral | Corporate<br>Offending                      |
| 14 | Meldrum,<br>Young,<br>Weerman,<br>2009                       | Adolescents                         | High risk middle<br>& high school<br>students<br>( <i>n</i> =1,978) | Long.  | LSCS-modified                          | Delinquency                                 |
| 15 | Miller,<br>Jennings,<br>Alvarez-<br>Rivera, 2009             | Adolescents                         | High School<br>Students in<br>Puerto Rico<br>( <i>n</i> =183)       | Cross. | Other: 8 items                         | Delinquency                                 |
| 16 | Moon,<br>McCluskey,<br>McCluskey,<br>2010                    | Adolescents                         | Korean Middle<br>school students<br>( <i>n</i> =2,751)              | Long.  | Other: 6 items                         | Computer<br>Crime                           |
| 17 | Morris,<br>Gerber,<br>Menard, 2011                           | Adults                              | Community<br>members<br>(NYSFS)<br>( <i>n</i> =1,139)               | Long.  | LCSC-modified                          | Crime                                       |
| 18 | Muraven,<br>Pogarsky,<br>Shmueli,<br>2006                    | Adults                              | College students<br>( <i>n</i> =102)                                | Cross. | LCSC                                   | Academic<br>dishonesty                      |
| 19 | Payne,<br>Higgins,<br>Blackwell,<br>2010                     | Adults                              | Community<br>members<br>( <i>n</i> =375)                            | Cross. | LCSC-modified                          | Partner<br>violence,<br>Criminal<br>History |
| 20 | Payne,<br>Triplett,<br>Higgins, 2011                         | Adults                              | Community<br>members<br>( <i>n</i> =375)                            | Cross  | LCSC-modified                          | Partner<br>violence                         |
| 21 | Piquero,<br>Moffitt,<br>Wright, 2007                         | Children,<br>adolescents,<br>adults | Community<br>members<br>(Dunedin)<br>( <i>n</i> =985)               | Long.  | Other: Multi-rater<br>scale            | Career<br>Criminality                       |
| 22 | Ratchford,<br>Beaver, 2008                                   | Children,<br>adolescents,<br>adults | Community<br>members<br>(NSC)<br>( <i>n</i> =2,031)                 | Long.  | Other: Multi-rater<br>scale            | Delinquency                                 |
| 23 | Rebllon,<br>Straus,                                          | Adults                              | University<br>students                                              | Cross. | Other: 6 items                         | Criminal<br>History                         |

|    |                                              |                                  |                                                                                             |        |                                        |                                  |
|----|----------------------------------------------|----------------------------------|---------------------------------------------------------------------------------------------|--------|----------------------------------------|----------------------------------|
|    | Medeiros,<br>2008                            |                                  | (n=20,000+)                                                                                 |        |                                        |                                  |
| 24 | Seipel, Eifler,<br>2008                      | Adults                           | Community<br>members<br>(n=494)                                                             | Cross. | LSCS                                   | Deviant<br>Action                |
| 25 | Sherkarkhar,<br>Gibson, 2011                 | Adolescents                      | Latino Youth<br>(n=739)                                                                     | Long.  | EASI                                   | Violent &<br>Property<br>Offense |
| 26 | Svensson,<br>Pauwels,<br>2008                | Adolescents                      | Students in<br>Belgium<br>(n=2,486)<br>Sweden<br>(n=1,003)                                  | Cross. | LCSC-modified                          | Delinquency                      |
| 27 | Svensson,<br>Pauwels,<br>Weerman,<br>2010    | Adolescents                      | Students in<br>Belgium<br>(n=2,486)<br>Sweden<br>(n=1,003), the<br>Netherlands<br>(n=1,978) | Cross  | LCSC-modified                          | Delinquency                      |
| 28 | Tittle, Ward,<br>Grasmik,<br>2003            | Adults                           | Community<br>members<br>(OCS-1994)<br>(n=350)                                               | Cross. | LCSC,<br>Other: 10 item-<br>behavioral | Crime                            |
| 29 | Vazsonyi<br>Huang, 2010                      | Children                         | Elementary<br>school students<br>(NICHD)<br>(n=1,155)                                       | Long.  | SSRS                                   | Deviant<br>behaviors             |
| 30 | Ward,<br>Gibson,<br>Boman, Leite,<br>2010    | Adults                           | University<br>students<br>(n=319)                                                           | Cross. | RBS 21 items-<br>behavioral            | Delinquency                      |
| 31 | Wikstrom,<br>Svensson,<br>2010               | Adolescents                      | Secondary school<br>students<br>(PYS)<br>(n=1,957)                                          | Cross. | LSCS-modified                          | Crime                            |
| 32 | Winfrey,<br>Taylor, He,<br>Esbensen,<br>2006 | Adolescents                      | Middle & high<br>school students<br>(n=965)                                                 | Long.  | LSCS-modified                          | Delinquency                      |
| 33 | Wright,<br>Caspi,<br>Moffitt, Silva,<br>2001 | Adolescents<br>& Young<br>Adults | Children<br>followed to<br>adulthood<br>[Dunedin]<br>(n= approx.1000)                       | Long.  | Other: Multi-rater<br>scale            | Crime                            |

## Studies of offender samples

|    | Citation                                           | Sample age                 | Sample description (size)                                 | Study Design | Self Control Measure      | Behavioral Outcome                       |
|----|----------------------------------------------------|----------------------------|-----------------------------------------------------------|--------------|---------------------------|------------------------------------------|
| 1  | Benda, Toombs, Corwyn, 2005                        | Adults                     | Boot camp graduates ( $n=692$ )                           | Long.        | Other: 9 items behavioral | Recidivism                               |
| 2  | Conner, Stein, Longshore, 2009                     | Adolescents & Young adults | Adolescent offenders in drug treatment (TASC) ( $n=317$ ) | Long.        | LSCS-modified             | Crime Drug Use                           |
| 3  | De Li 2005                                         | Adults                     | Jail inmates ( $n=532$ )                                  | Cross.       | LSCS                      | Drug Problems                            |
| 4  | DeLisi, Hochstetler, Higgins, Beaver, Graeve, 2008 | Adults                     | Prison Inmates on Work Release Parole ( $n=208$ )         | Cross.       | LSCS-modified             | Prison misbehavior                       |
| 5  | DeLisi, Vaughn, 2008                               | Adolescents                | Incarcerated youths ( $n=723$ )                           | Cross.       | Other: 15 items           | Career Criminality                       |
| 6  | Kerley, Copes, Tewksbury, Dabney, 2011             | Adults                     | Prison Inmates on Work Release Parole ( $n=208$ )         | Cross        | LSCS                      | Prison misbehavior                       |
| 7  | Kerley, Hochstetler, Copes, 2009                   | Adults                     | Prison Inmates on work release parole ( $n=208$ )         | Cross        | LSCS                      | Prison misbehavior, Prison Victimization |
| 8  | Kissner, Pyrooz, 2009                              | Adults                     | Jail inmates ( $n=200$ )                                  | Cross.       | LSCS-modified             | Gang Membership                          |
| 9  | Langton, 2006                                      | Adolescents                | Juvenile Offenders ( $n=4,146$ )                          | Long.        | CPI-SC                    | Parole completion                        |
| 10 | Longshore, Chang, Hsieh, Messina, 2004             | Adults                     | Adult offenders in drug treatment (TASC) ( $n=1,036$ )    | Long.        | Other: 12 items           | Drug use, Friends' drug use              |
| 11 | Longshore, Chang, Messina, 2005                    | Adolescents                | Adolescent offenders in drug treatment ( $n=359$ )        | Long.        | Other: 12 items           | Crime, Deviant peer association          |
| 12 | Packer, Best, Day and Wood, 2009                   | Adolescents & adults       | Participants in drug treatment ( $n=50$ )                 | Cross.       | LSCS                      | Drug use, Crime                          |
| 13 | Piquero,                                           | Adolescents                | Juvenile                                                  | Long.        | Other: 7 items-           | Crime,                                   |

|    |                                                  |          |                                                                 |        |                |                                                     |
|----|--------------------------------------------------|----------|-----------------------------------------------------------------|--------|----------------|-----------------------------------------------------|
|    | MacDonald,<br>Dobrin,<br>Daigle,<br>Cullen, 2005 | & adults | offenders on<br>parole<br>( <i>n</i> =3,995)                    |        | behavioral     | Violent<br>offense                                  |
| 14 | Pogarsky,<br>2007                                | Adults   | Adult offenders<br>in supervised<br>release<br>( <i>n</i> =434) | Long.  | Other: 4 items | Drug use,<br>Violation of<br>conditional<br>release |
| 15 | Ross,<br>Fontano,<br>2007                        | Adults   | German<br>offenders<br>( <i>n</i> =83)                          | Cross. | VCQ            | Aggression                                          |

**Samples:** *Add Health* = The National Longitudinal Study of Adolescent Health, *Dunedin* = Dunedin Multidisciplinary Health and Development Study, *FACHS* = Family and Community Health Study, *NICHD* = National Institute of Child Health and Human Development Longitudinal Study, *NLSY* = National Longitudinal Study of Youth, *NSC* = National survey of Children, *NYSFS* = National Youth Survey Family Study, *OCS* = Oklahoma City Survey, *PYS* = Peterborough Youth Study, *TASC* = Treatment Alternatives to Street Crime Study, **Study Design:** *Cross.* = Cross Sectional Study, *Long.* = Longitudinal Study, **Measures:** *BSCS* = Brief Self Control Scale (Tangney et al., 2004), *CPI-SC* = Self-control subscale of the California Psychological Inventory (Gough, 1987), *EASI* = EASI Temperament Survey administered (Buss & Plomin, 1975), *LSCS* = Low Self Control Scale (Grasmick et al., 1993), *RBS* = Retrospective Behavioral Self-Control, *SSRS* = Social Skills Rating System (Gresham & Elliot, 1990), *TRCBC* = The Teacher Report of Classroom Behavior Checklist, *VCQ* = Volitional Components Questionnaire. All measures are self-report, unless specified other rater. *Behavioral* = Self-control assessed by items about problem behavior.

- 1  
2  
3 Baker, J. O. (2010). The expression of low self-control as problematic drinking in adolescents: An  
4 integrated control perspective. *Journal of Criminal Justice*, 38(3), 237-244. Elsevier Ltd.  
5 doi:10.1016/j.jcrimjus.2010.02.011  
6
- 7 Baron, S. W., Forde, D. R., & Kay, F. M. (2007). Self-control, risky lifestyles, and situation : The role of  
8 opportunity and context in the general theory. *Journal of Criminal Justice*, 35, 119-136.  
9 doi:10.1016/j.jcrimjus.2007.01.001  
10
- 11 Beaver, K. M., DeLisi, M., Mears, D. P., & Stewart, E. (2009). Low self-control and contact with the  
12 criminal justice system in a nationally representative sample of males. *Justice Quarterly*, 26(4), 695-  
13 715. doi:10.1080/07418820802593352  
14
- 15 Benda, B. B., Toombs, N. J., & Corwyn, R. F. (2005). Self-control, gender and age. *Journal of Offender*  
16 *Rehabilitation*, 37-41.  
17
- 18 Beaver, K. M., DeLisi, M., Vaughn, M. G., & Wright, J. P. (2010). The intersection of genes and  
19 neuropsychological deficits in the prediction of adolescent delinquency and low self-control.  
20 *International journal of offender therapy and comparative criminology*, 54(1), 22-42.  
21 doi:10.1177/0306624X08325349  
22
- 23 Blackwell, B. S., & Piquero, A. R. (2005). On the relationships between gender, power control, self-  
24 control, and crime. *Journal of Criminal Justice*, 33(1), 1-17. doi:10.1016/j.jcrimjus.2004.10.001  
25
- 26 Burt, C. H., Simons, R. L., & Simons, L. G. (2006). A Longitudinal test of the effects of parenting and the  
27 stability of self-control: Negative evidence for the general theory of crime. *Criminology*, 44(2), 353-  
28 396.  
29
- 30 Conner, B. T., Stein, J. A., & Longshore, D. (2008). Examining self-control as a multidimensional  
31 predictor of crime and drug use in adolescents with criminal histories, *The Journal of Behavioral*  
32 *Health Services and Research*, 36(2), 137-149.  
33
- 34 Cretacci, M. A. (2008). A General test of self-control theory: Has its importance been exaggerated?  
35 *International Journal of Offender Therapy and Comparative Criminology*, 52(5)  
36 doi:10.1177/0306624X07308665  
37
- 38 De Li, S. (2005). Race, self-control, and drug problems among jail inmates. *Journal of Drug Issues*, 35(4),  
39 645-663. doi:10.1177/002204260503500401  
40
- 41 Delisi, M., Hochstetler, A., Higgins, G. E., Beaver, K. M., & Graeve, C. M. (2008). Toward a general  
42 theory of criminal justice: Low self-control and offender noncompliance. *Criminal Justice Review*,  
43 33, 141-158 doi:10.1177/0734016808316781  
44
- 45 DeLisi, M., & Vaughn, M. G. (2008). The Gottfredson-Hirschi critiques revisited: Reconciling self-control  
46 theory, criminal careers, and career criminals. *International journal of offender therapy and*  
47 *comparative criminology*, 52(5), 520-37. doi:10.1177/0306624X07308553  
48
- 49 Desmond, S.A., Bruce, A. S., & Stacer, M. J. (2012). Self-control, opportunity, and substance use. *Deviant*  
50 *Behavior*, 33(6), 425-447. doi:10.1080/01639625.2011.584055  
51
- 52 Hay, C., & Forrest, W. (2008). Self-Control Theory and the Concept of Opportunity: the Case for a More  
53 Systematic Union. *Criminology*, 46(4), 1039-1072. doi:10.1111/j.1745-9125.2008.00135  
54  
55  
56  
57  
58  
59  
60

- 1  
2  
3 Higgins, G. E. (2009). Parental criminality and low self-control: an examination of delinquency. *Criminal*  
4 *Justice Studies*, 22(2), 141-152. doi:10.1080/14786010902975416
- 5  
6 Holtfreter, K., Reising, M. D., Leeper Piquero, N., & Piquero, a. R. (2010). Low self-control and fraud:  
7 Offending, victimization, and their overlap. *Criminal Justice and Behavior*, 37(2), 188-203.  
8 doi:10.1177/0093854809354977
- 9  
10 Kerley, K. R., Hochstetler, A., & Copes, H. (2009). Self-Control, prison victimization, and prison  
11 infractions. *Criminal Justice Review*, 34(4), 553-568. doi:10.1177/0734016809332840
- 12  
13 Kerley, K. R., Copes, H., Tewksbury, R., & Dabney, D. A. (2011). Examining the relationship between  
14 religiosity and self-control as predictors of prison deviance. *International Journal of Offender*  
15 *Therapy and Comparative Criminology*, 55, 1251-1271. doi:10.1177/0306624X11387523
- 16  
17 Kissner, J., & Pyrooz, D. C. (2009). Self-control, differential association, and gang membership : A  
18 theoretical and empirical extension of the literature. *Journal of Criminal Justice*, 37(5), 478-487.  
19 doi:10.1016/j.jcrimjus.2009.07.008
- 20  
21 Langton, L. (2006). Low self-control and parole failure : An assessment of risk from a theoretical  
22 perspective, *Journal of Criminal Justice*, 34, 469-478. doi:10.1016/j.jcrimjus.2006.09.002
- 23  
24 Larsen, H., Overbeek, G., Vermulst, A.A., Granic, I., & Engels, R. C. M. E. (2010). Initiation and  
25 continuation of best friends and adolescents alcohol consumption: Do self-esteem and self-control  
26 function as moderators? *International Journal of Behavioral Development*, 34(5), 406-416.  
27 doi:10.1177/0165025409350363
- 28  
29 Leeper Piquero, N., Schoepfer, a., & Langton, L. (2008). Completely Out of Control or the Desire to Be in  
30 Complete Control? How Low Self-Control and the Desire for Control Relate to Corporate Offending.  
31 *Crime & Delinquency*, 56(4), 627-647. doi:10.1177/001128708325052
- 32  
33 Longshore, D., Chang, E., & Messina, N. (2005). Self-Control and social bonds : A Combined control  
34 perspective on juvenile offending, *Journal of Quantitative Criminology*, 21(4). doi:10.1007/s10940-  
35 005-7359-2
- 36  
37 Longshore, D., Chang, E., Hsieh, S., Messina, N. (2004). Self-Control and social bonds: A Combined  
38 control perspective on deviance. *Crime & Delinquency*, 50(4), 542-564.  
39 doi:10.1177/001128703260684
- 40  
41 Meldrum, R. C., Young, J. T. N., & Weerman, F. M. (2009). Reconsidering the effect of self-control and  
42 delinquent peers: Implications of measurement for theoretical significance. *Journal of Research in*  
43 *Crime and Delinquency*, 46(3), 353-376. doi:10.1177/0022427809335171
- 44  
45 Miller, H. V., Jennings, W. G., Alvarez-Rivera, L. L., & Lanza-Kaduce, L. (2009). Self-control,  
46 attachment, and deviance among Hispanic adolescents. *Journal of Criminal Justice*, 37(1), 77-84.  
47 doi:10.1016/j.jcrimjus.2008.12.003
- 48  
49 Moon, B., McCluskey, J. D., & McCluskey, C. P. (2010). A general theory of crime and computer crime:  
50 An Empirical test. *Journal of Criminal Justice*, 38(4), 767-772. Elsevier Ltd.  
51 doi:10.1016/j.jcrimjus.2010.05.003
- 52  
53 Morris, R. G., Gerber, J., & Menard, S. (2011). Social Bonds, Self-Control, and Adult Criminality: A  
54 Nationally Representative Assessment of Hirschi's Revised Self-Control Theory. *Criminal Justice*  
55 *and Behavior*, 38(6), 584-599. doi:10.1177/0093854811402453
- 56  
57  
58  
59  
60



- 1  
2  
3 Muraven, M., Pogarsky, G., & Shmueli, D. (2006). Self-control depletion and the general theory of crime.  
4 *Journal of Quantitative Criminology*, 22(3), 263-277. doi:10.1007/s10940-006-9011-1  
5  
6  
7 Packer, G., Best, D., Day, E., Wood, K. (2009). Criminal thinking and self-control among drug users in  
8 court mandated treatment. *Criminology and Criminal Justice*. doi:10.1177/1748895808099182  
9  
10 Payne, B. K., Higgins, G. E., & Blackwell, B. (2010). Exploring the link between self-control and partner  
11 violence: Bad parenting or general criminals. *Journal of Criminal Justice*, 38(5), 1015-1021.  
12 doi:10.1016/j.jcrimjus.2010.07.003  
13  
14 Payne, B. K., Triplett, R. A., & Higgins, G.E. (2011). The Relationship Between Self-Control, Witnessing  
15 Domestic Violence, and Subsequent Violence, *Deviant Behavior*, 32:9, 769-789  
16  
17 Piquero, A.R., Moffitt, T. E., & Wright, B. E. (2007). Self-Control and Criminal Career Dimensions.  
18 *Journal of Contemporary Criminal Justice*, 23(1), 72-89. doi:10.1177/1043986206298949  
19  
20 Piquero, A. R., Macdonald, J., Dobrin, A., Daigle, L. E., & Cullen, F. T. (2005). Self-Control , violent  
21 offending, and homicide victimization : Assessing the general Theory of crime, *Journal of*  
22 *Quantitative Criminology*, 21(1), 55-72. doi:10.1007/s10940-004-1787-2  
23  
24 Pogarsky, G. (2006). Deterrence and individual differences among convicted offenders. *Journal of*  
25 *Quantitative Criminology*, 23(1), 59-74. doi:10.1007/s10940-006-9019-6  
26  
27 Ratchford, M., & Beaver, K. M. (2008). Neuropsychological deficits, low self-control, and delinquent  
28 involvement: Toward a biosocial explanation of delinquency. *Criminal Justice and Behavior*, 36(2),  
29 147-162. doi:10.1177/0093854808325967  
30  
31 Rebellon, C. J., Straus, M.A., & Medeiros, R. (2008). Self-control in global perspective: An Empirical  
32 assessment of Gottfredson and Hirschi's general theory within and across 32 national settings.  
33 *European Journal of Criminology*, pp. 331-361). doi:10.1177/1477370808090836  
34  
35 Ross, T., & Fontao, M. I. (2008). The Relationship of self-regulation and aggression: An Empirical Test of  
36 personality systems theory. *International Journal of Offender Therapy and Comparative*  
37 *Criminology*, 52, 554-570. doi:10.1177/0306624X07308667  
38  
39 Seipel, C., & Eifler, S. (2008). Opportunities, rational choice, and self-control: On the Interaction of person  
40 and situation in a general theory of crime. *Crime & Delinquency*, 56(2), 167-197.  
41 doi:10.1177/0011128707312525  
42  
43 Shekarkhar, Z., & Gibson, C. L. (2011). Gender, Self-Control, and Offending Behaviors Among Latino  
44 Youth. *Journal of Contemporary Criminal Justice*, 27(1), 63-80. doi:10.1177/1043986211402224  
45  
46  
47 Svensson, R., & Pauwels, L. (2008). Is a Risky Lifestyle Always "Risky"? The Interaction Between  
48 Individual Propensity and Lifestyle Risk in Adolescent Offending: A Test in Two Urban Samples.  
49 *Crime & Delinquency*, 56(4), 608-626. doi:10.1177/0011128708324290  
50  
51 Svensson, R., Pauwels, L., & Weerman, F. M. (2010). Does the Effect of Self-Control On Adolescent  
52 Offending Vary By Level of Morality?: A Test in Three Countries. *Criminal Justice and Behavior*,  
53 37(6), 732-743. doi:10.1177/0093854810366542  
54  
55 Tittle, C. R., Ward, D. A., & Grasmick, H. G. (2003). Gender, Age, and Crime/Deviance: A Challenge to  
56 Self-Control Theory. *Journal of Research in Crime and Delinquency*, 40(4), 426-453.  
57 doi:10.1177/0022427803256074  
58  
59  
60



- 1  
2  
3 Vazsonyi, A. T., & Huang, L. (2010). Where self-control comes from: on the development of self-control  
4 and its relationship to deviance over time. *Developmental psychology*, 46(1), 245-57.  
5 doi:10.1037/a0016538  
6
- 7 Ward, J. T., Gibson, C. L., Boman, J., & Leite, W. L. (2010). Assessing the Validity of the Retrospective  
8 Behavioral Self-Control Scale: Is the General Theory of Crime Stronger Than the Evidence  
9 Suggests? *Criminal Justice and Behavior*, 37(3), 336-357. doi:10.1177/0093854809359673  
10
- 11 Wikstrom, P. H., & Svensson, R. (2010). When does self-control matter? The interaction between morality  
12 and self-control in crime causation. *European Journal of Criminology*, 7(5), 395-410.  
13 doi:10.1177/1477370810372132  
14
- 15 Winfree, L. T., & Taylor, T. J. (2006). Self-control and variability over time : Multivariate results using a  
16 5-Year, multisite panel of youths, *Crime and Delinquency*, 52(2), 253-286.  
17 doi:10.1177/0011128705278012  
18
- 19 Wright, B. R. E., Moffitt, T. E., Silva, P. A., & Al, W. E. T. (2001). The Effects of Social Ties on Crime  
20 Vary by Criminal Propensity : A Life-Course Model of Interdependence, 39(2), 321-352.  
21  
22  
23  
24  
25  
26  
27  
28  
29  
30  
31  
32  
33  
34  
35  
36  
37  
38  
39  
40  
41  
42  
43  
44  
45  
46  
47  
48  
49  
50  
51  
52  
53  
54  
55  
56  
57  
58  
59  
60

## II. Community Functioning Index Scoring

*Community Functioning Index.* This index is comprised of eight items chosen from a measure of detailed demographic information (i.e. ethnicity, income, employment, family information) given at the one year post-release interview. The eight items selected are thought to represent community functioning in the year after release; items include residential stability, homeownership, marital status, largest source of support, valid driver's license, financial support of children, educational and vocational upgrades, and volunteerism. Participant responses on each of the eight items were evaluated in terms of the level of adaptive functioning; responses deemed to be adaptive were given a score of 1, and those that were either neutral or maladaptive were given a score of 0.

*a. Residential Stability.* Participants were asked (1) where they lived/stayed most of the time in the year after their release other than incarceration, and (2) how many other places they lived in that year. Possible responses for the first question included with parents, with spouse/long-term partner, with other relatives, with a group of friends or non-family members, alone in one's own dwelling, homeless, or in a hospital or other type of rehabilitation facility. Participants received a score of "1" if they were not homeless and reported having less than three residences in the year after release. Participants who lived more than two places in the year after release received a score of 0.

*b. Homeownership.* Participants were asked whether they currently owned their own home. They were given a score of 1 on this item if they reported owning their own home, and a score of 0 if they did not.

*c. Current Marital Status.* Participants were asked their marital status (i.e., never married, living as married/common-law, separated, divorced, or widowed, or other) at one-year post release. If participants reported being legally married, they were given a 1 for this item; if they reported any other marital status they received a score of 0.

*d. Largest Source of Support.* Participants reported their largest source of support in the year after release; options included own job, mate/spouse, family or friends, unemployment, prostitution, illegal activities, and other. Participants received a score of 1 on this item if they reported that their job was their largest source of support, and a 0 if they reported any other source.

*e. Valid Driver's License.* Participants were asked if they had a valid drivers license or not at one-year post release. If participants reported having a valid driver's license, they received a score of 1 on this item.

*f. Financial Support of Children.* Participants reported (1) how many children they were financially responsible for and (2) how many children they were currently financially supporting. In order to determine discrepancies in responsibility and support, difference scores were calculated; the number of children participants were financially supporting was subtracted from the number of children participants were financially responsible for. If the difference score was less than or equal to 0 (i.e. they were supporting the same number of children or more than they were responsible for), participants received a score of 1 on this item. If the difference score was greater than 0 (i.e. they failed to support some or all of the children they were responsible for), they received a score of 0. If participants reported neither being responsible for nor financially

1  
2  
3 supporting any children (i.e. both values were 0 and difference score was equal to 0), they  
4 also received a 0 on this item because this is considered neither adaptive nor maladaptive.  
5

6 *g. Educational and Vocational Upgrades.* Participants were asked several  
7 questions about their participation in and completion of various educational and  
8 vocational upgrades in the year after their release. Participants were asked whether they  
9 had graduated from high school, completed a vocational or technical training program,  
10 completed their GED, or completed college, as well as whether they had worked on their  
11 GED or any type of vocational or technical training, took college classes, or participated  
12 in any other training or seminars. If participants endorsed any of these (worked on or  
13 completed any upgrade), they received a 1 for this item. If participants did not work on or  
14 complete any vocational or educational upgrades, they received a score of 0.  
15

16 *h. Volunteerism.* Participants were asked whether or not they volunteered in their  
17 community in the year after being released. If participants reported volunteering in their  
18 community in the first year after their release, they received a score of 1 on this item.  
19  
20  
21  
22  
23  
24  
25  
26  
27  
28  
29  
30  
31  
32  
33  
34  
35  
36  
37  
38  
39  
40  
41  
42  
43  
44  
45  
46  
47  
48  
49  
50  
51  
52  
53  
54  
55  
56  
57  
58  
59  
60
